# Supplementary material for: In Vitro Antibacterial Activity of Microbial Natural Products against Bacterial Pathogens of Veterinary and Zoonotic Relevance
Source: MDPI journal article supplement (doi:10.3390/antibiotics13020135), 2024-01-30
Supplement: s1 [file s1]

# ***In Vitro* Antibacterial Activity of Microbial Natural Products against Bacterial Pathogens of Veterinary and Zoonotic Relevance**

**Stefanie A. Barth <sup>1,\*</sup>, Daniel Preussger <sup>1</sup>, Jana Pietschmann <sup>1</sup>, Andrea T. Feßler <sup>2,3</sup>, Martin Heller <sup>1</sup>, Werner Herbst <sup>4</sup>, Christiane Schnee <sup>1</sup>, Stefan Schwarz <sup>2,3</sup>, Florian Kloss <sup>5</sup>, Christian Berens <sup>1</sup> and Christian Menge <sup>1</sup>**

<sup>1</sup> Friedrich-Loeffler-Institut—Federal Research Institute for Animal Health (FLI), Institute of Molecular Pathogenesis, 07743 Jena, Germany

<sup>2</sup> Institute of Microbiology and Epizootics, Freie Universität Berlin, 14163 Berlin, Germany

<sup>3</sup> Veterinary Centre for Resistance Research (TZR), Freie Universität Berlin, 14163 Berlin, Germany

<sup>4</sup> Institute of Hygiene and Infectious Diseases of Animals, Justus-Liebig-University, 35392 Giessen, Germany

<sup>5</sup> Transfer Group Anti-Infectives, Leibniz Institute for Natural Product Research and Infection Biology, Leibniz-HKI, 07745 Jena, Germany

\* Correspondence: stefanie.barth@fli.de

## **Content**

**Table S1.** Results of pre-screening the natural products against different bacterial species.

**Table S2.** Results of testing additional *Mannheimia haemolytica* and *Pasteurella multocida* isolates, previously tested for resistance against common antibiotics, for growth or growth inhibition in the presence of natural products celastramycin A, maduranic acid, and closthioamide. All strains are isolated from animals without prior antibiotic treatment, at least for four weeks.

**Table S1.** Results of pre-screening the natural products against different bacterial species

| Bacterial species                                     | Isolate ID              | Host species or reference <sup>1</sup> | Resistance profile <sup>2</sup>                            | Source <sup>3</sup> | Minimal inhibitory concentration (MIC) [µg/mL] |                   |                   |                    |                    |                   |                     |                  |
|-------------------------------------------------------|-------------------------|----------------------------------------|------------------------------------------------------------|---------------------|------------------------------------------------|-------------------|-------------------|--------------------|--------------------|-------------------|---------------------|------------------|
|                                                       |                         |                                        |                                                            |                     | Celastra-<br>mycin A                           | Cervi-<br>mycin C | Cervi-<br>mycin D | Cervi-<br>mycin K1 | Closthio-<br>amide | Griseo-<br>chelin | Madu-<br>ranic acid | Micaco-<br>cidin |
| <i>Escherichia coli</i>                               | ATCC 25922              | control strain                         | unknown status                                             | DSMZ                | >16                                            | >16               | >16               | >16                | >16                | >16               | >16                 | >16              |
| <i>Staphylococcus aureus</i>                          | ATCC 29213              | control strain                         | unknown status                                             | DSMZ                | 0.031                                          | >16               | >16               | 0.5                | 0.125              | >16               | 0.25                | >16              |
| <i>Clostridioides difficile</i>                       | 10S0042/RT660           | cattle                                 | unknown status                                             | FLI-IBIZ            | 4                                              | 8                 | 8                 | 8                  | >16                | 4                 | >16                 | >16              |
|                                                       | 11S0095/RT620           | cattle                                 | unknown status                                             | FLI-IBIZ            | 4                                              | 8                 | 8                 | 8                  | >16                | 4                 | >16                 | >16              |
|                                                       | 11S0044/RT078           | pig                                    | unknown status                                             | FLI-IBIZ            | 4                                              | 8                 | 8                 | 8                  | >16                | 4                 | >16                 | >16              |
|                                                       | 12S0090/RT002           | pig                                    | unknown status                                             | FLI-IBIZ            | 4                                              | 8                 | 8                 | 8                  | >16                | 4                 | >16                 | >16              |
| <i>Mycobacterium avium</i><br><i>ssp. avium</i>       | ATCC 25291 <sup>T</sup> | type strain                            | unknown status                                             | DSMZ                | 8                                              | >16               | >16               | >16                | 16                 | >16               | 16                  | >16              |
| <i>Mycobacterium avium</i><br><i>ssp. hominissuis</i> | ATCC 700898             | control strain                         | unknown status                                             | ATCC                | 4                                              | >16               | >16               | >16                | 8                  | >16               | 16                  | >16              |
|                                                       | 00A0854                 | cattle                                 | unknown status                                             | FLI-IMP             | 4                                              | >16               | >16               | >16                | >16                | >16               | >16                 | >16              |
|                                                       | 00A0799                 | cattle                                 | unknown status                                             | FLI-IMP             | 4                                              | 16                | 16                | 16                 | 8                  | >16               | 8                   | >16              |
|                                                       | 03A2893                 | cattle                                 | unknown status                                             | FLI-IMP             | 4                                              | >16               | >16               | >16                | >16                | >16               | >16                 | >16              |
|                                                       | 09MA1289                | pig                                    | unknown status                                             | FLI-IMP             | 8                                              | 16                | >16               | >16                | 4                  | >16               | 4                   | >16              |
| <i>Mycoplasma bovis</i>                               | PG45 <sup>T</sup>       | type strain                            | unknown status                                             | FLI-IMP             | 16                                             | 16                | 16                | 16                 | 0.031              | 8                 | 16                  | 16               |
|                                                       | 393B08                  | cattle                                 | TYL, TIL, LIN, CLI, ERY, CHL, FLO, SPT, TET, ENR, MAR, TUL | FLI-IMP/VLA         | 4                                              | 16                | 16                | 16                 | 0.016              | 16                | 16                  | >16              |
|                                                       | 216B09                  | cattle                                 | TYL, TIL, LIN, CLI, ERY, CHL, FLO, SPT, TET, TUL           | FLI-IMP/VLA         | 16                                             | 16                | 16                | 16                 | 0.031              | 16                | >16                 | 16               |

| Bacterial species                 | Isolate ID | Host species or reference <sup>1</sup> | Resistance profile <sup>2</sup>                            | Source <sup>3</sup> | Minimal inhibitory concentration (MIC) [µg/mL] |                   |                   |                    |                    |                   |                     |                  |
|-----------------------------------|------------|----------------------------------------|------------------------------------------------------------|---------------------|------------------------------------------------|-------------------|-------------------|--------------------|--------------------|-------------------|---------------------|------------------|
|                                   |            |                                        |                                                            |                     | Celastra-<br>mycin A                           | Cervi-<br>mycin C | Cervi-<br>mycin D | Cervi-<br>mycin K1 | Closthio-<br>amide | Griseo-<br>chelin | Madu-<br>ranic acid | Micaco-<br>cidin |
|                                   | 369B09     | cattle                                 | TYL, TIL, LIN, CLI, ERY, CHL, FLO, SPT, TET, ENR, MAR, TUL | FLI-IMP/VLA         | 16                                             | 16                | >16               | >16                | 0.031              | 16                | >16                 | >16              |
|                                   | 263B09     | cattle                                 | TIL, ERY, CHL, SPT, TET                                    | FLI-IMP/VLA         | 16                                             | 16                | 16                | 16                 | 0.016              | 16                | 16                  | >16              |
|                                   | 410B09     | cattle                                 | TIL, ERY, CHL, FLO, TET                                    | FLI-IMP/VLA         | 16                                             | >16               | >16               | 16                 | 0.031              | 16                | >16                 | >16              |
|                                   | 268B07     | cattle                                 | TIL, ERY, CHL                                              | FLI-IMP/VLA         | 8                                              | 16                | 16                | 16                 | 0.03               | 16                | >16                 | >16              |
| <i>Mannheimia haemolytica</i>     | P649       | cattle                                 | TET                                                        | FLI-ING             | 0.125                                          | >16               | >16               | >16                | 0.25               | >16               | 4                   | >16              |
|                                   | M3         | cattle                                 | TET                                                        | FLI-ING             | 0.5                                            | >16               | >16               | >16                | 0.5                | >16               | 8                   | >16              |
|                                   | 667        | cattle                                 | AMP, TET                                                   | FLI-ING             | 0.25                                           | >16               | >16               | >16                | 0.5                | >16               | >16                 | >16              |
|                                   | 652        | cattle                                 | susceptible                                                | FLI-ING             | 0.25                                           | >16               | >16               | >16                | >16                | >16               | 16                  | >16              |
|                                   | 650        | cattle                                 | susceptible                                                | FLI-ING             | 0.25                                           | >16               | >16               | >16                | 2                  | >16               | 8                   | >16              |
| <i>Pasteurella multocida</i>      | B624       | pig                                    | TET                                                        | FLI-ING             | 0.125                                          | >16               | >16               | >16                | 0.063              | >16               | 0.5                 | >16              |
|                                   | O6551      | cattle                                 | susceptible                                                | FLI-ING             | 0.063                                          | >16               | >16               | >16                | 0.031              | >16               | 0.125               | >16              |
|                                   | B368       | not known                              | susceptible                                                | FLI-ING             | 0.031                                          | >16               | >16               | >16                | 0.063              | >16               | 0.5                 | >16              |
|                                   | H301       | not known                              | susceptible                                                | FLI-ING             | 0.063                                          | >16               | >16               | >16                | 0.063              | >16               | 0.5                 | >16              |
|                                   | H287       | not known                              | susceptible                                                | FLI-ING             | 0.063                                          | >16               | >16               | >16                | 0.063              | >16               | 0.5                 | >16              |
| <i>Brachyspira hyodysenteriae</i> | ATCC 49526 | pig                                    | TYL                                                        | JLU-IHIT            | >16                                            | >16               | >16               | >16                | 4                  | 2                 | >16                 | >16              |
|                                   | B204       | pig                                    | TYL                                                        | JLU-IHIT            | >16                                            | >16               | >16               | >16                | 8                  | 2                 | >16                 | >16              |
|                                   | G385       | pig                                    | TYL                                                        | JLU-IHIT            | >16                                            | >16               | >16               | >16                | 0.5                | 2                 | >16                 | >16              |

| Bacterial species     | Isolate ID       | Host species or reference <sup>1</sup> | Resistance profile <sup>2</sup> | Source <sup>3</sup> | Minimal inhibitory concentration (MIC) [µg/mL] |                   |                   |                    |                    |                   |                     |                  |
|-----------------------|------------------|----------------------------------------|---------------------------------|---------------------|------------------------------------------------|-------------------|-------------------|--------------------|--------------------|-------------------|---------------------|------------------|
|                       |                  |                                        |                                 |                     | Celastra-<br>mycin A                           | Cervi-<br>mycin C | Cervi-<br>mycin D | Cervi-<br>mycin K1 | Closthio-<br>amide | Griseo-<br>chelin | Madu-<br>ranic acid | Micaco-<br>cidin |
|                       | G504             | pig                                    | TYL                             | JLU-IHIT            | >16                                            | >16               | >16               | >16                | >16                | >16               | >16                 | >16              |
|                       | G296             | pig                                    | susceptible                     | JLU-IHIT            | >16                                            | >16               | >16               | >16                | 4                  | 2                 | >16                 | >16              |
|                       | G347             | pig                                    | susceptible                     | JLU-IHIT            | >16                                            | >16               | >16               | >16                | 0.5                | 2                 | >16                 | >16              |
|                       | G367             | pig                                    | TIA, VAL                        | JLU-IHIT            | >16                                            | >16               | >16               | >16                | 0.5                | 4                 | >16                 | >16              |
|                       | G376             | pig                                    | TIA, VAL                        | JLU-IHIT            | >16                                            | >16               | >16               | >16                | 2                  | 2                 | >16                 | >16              |
|                       | G382             | pig                                    | susceptible                     | JLU-IHIT            | >16                                            | >16               | >16               | >16                | 1                  | 2                 | >16                 | >16              |
|                       | G387             | pig                                    | susceptible                     | JLU-IHIT            | >16                                            | >16               | >16               | >16                | 0.5                | 2                 | >16                 | >16              |
| <i>Chlamydia suis</i> | S45 <sup>T</sup> | type strain                            | susceptible                     | FLI-IMP             | >16                                            | >16               | 16                | n.t.               | 1                  | n.t.              | 4                   | >16              |
|                       | DC127            | pig                                    | TET                             | FLI-IMP             | 2                                              | >16               | >16               | n.t.               | 0.5                | n.t.              | 4                   | >16              |

**Annotations:** 1) **Type strains** as stated by the ATCC strain collection, **control strains** are recommended by the respective CLSI protocol.

2) **AMP**, ampicillin (aminopenicillin β-lactam); **CHL**, chloramphenicol (amphenicol); **CLI**, clindamycin (lincosamide); **ENR**, enrofloxacin (quinolone); **ERY**, erythromycin (macrolide); **FLO**, florfenicol (amphenicol); **LIN**, lincomycin (lincosamide); **MAR**, marbofloxacin (quinolone); **SPT**, spectinomycin (aminocyclitol); **TET**, tetracycline; **TIA**, tiamulin (pleuromutilin); **TIL**, tilmicosin (macrolide); **TUL**, tulathromycin (macrolide); **TYL**, tylosin (macrolide); **VAL**, valnemulin (pleuromutilin).

3) **ATCC**, American type culture collection, U.S.A.; **DSMZ**, Deutsche Sammlung von Mikroorganismen und Zellkulturen, Germany; **FLI**, Friedrich-Loeffler-Institut - Federal Research Institute for Animal Health; **IBIZ**, Institute of Bacterial Infections and Zoonoses; **IMP**, Institute of Molecular Pathogenesis; **ING**, Institute of Farm Animal Genetics; **JLU-IHIT**, Institute of Hygiene and Infectious Diseases of Justus-Liebig-University Giessen; **VLA**, Veterinary Laboratories Agency, UK.

**n.t.**, not tested.

**Table S2.** Results of testing additional *Mannheimia haemolytica* and *Pasteurella multocida* isolates, previously tested for resistance against common antibiotics, for growth or growth inhibition in the presence of natural products celastramycin A, maduranic acid, and closthioamide. All strains are isolated from animals without prior antibiotic treatment, at least for four weeks.

| Isolate                       | Origin/<br>clinical<br>status <sup>1</sup> | Resistance profile <sup>2</sup>           | Minimal inhibitory concentration (MIC)<br>[µg/mL] |                   |                    |
|-------------------------------|--------------------------------------------|-------------------------------------------|---------------------------------------------------|-------------------|--------------------|
|                               |                                            |                                           | Celastra-<br>mycin A                              | Maduranic<br>acid | Closthio-<br>amide |
| <i>Mannheimia haemolytica</i> |                                            |                                           |                                                   |                   |                    |
| A5667/2                       | cattle/D                                   | TET, STR, AMP, SXT, TMP                   | 0.5                                               | >16               | 0.5                |
| A5747                         | cattle/D                                   | TET, STR, AMP                             | 0.5                                               | >16               | 0.5                |
| M166                          | cattle/D                                   | TET, STR, AMP, CHL                        | 0.5                                               | >16               | 4                  |
| M395                          | cattle/D                                   | TET, STR                                  | 0.5                                               | >16               | 1                  |
| M55                           | cattle/D                                   | TET, STR, AMP, CHL                        | 0.25                                              | >16               | 2                  |
| P658                          | cattle/D                                   | TET, STR, AMP                             | 0.5                                               | >16               | 1                  |
| R130                          | cattle/D                                   | TET, STR                                  | 0.5                                               | >16               | 2                  |
| R140                          | cattle/D                                   | TET, STR, AMP, CHL                        | 0.5                                               | >16               | 4                  |
| R141                          | cattle/D                                   | TET, STR, AMP, CHL                        | 0.25                                              | >16               | 1                  |
| R144                          | cattle/D                                   | TET, STR, AMP, CHL                        | 0.5                                               | >16               | 2                  |
| R241                          | cattle/D                                   | TET, STR, AMP                             | 0.25                                              | >16               | 1                  |
| R47                           | cattle/D                                   | TET, STR, AMP                             | 0.25                                              | >16               | 1                  |
| U-B143                        | cattle/D                                   | TET, STR                                  | 0.5                                               | >16               | 1                  |
| U-B144                        | cattle/D                                   | TET, STR, AMP                             | 0.5                                               | >16               | 2                  |
| U-B352                        | cattle/D                                   | TET, STR                                  | ≤0.008                                            | 8                 | 0.25               |
| U-B375                        | cattle/D                                   | TET, STR, AMP                             | 0.5                                               | >16               | 1                  |
| U-B379                        | cattle/D                                   | TET, STR, AMP, GEN                        | 0.5                                               | >16               | 2                  |
| U-B386                        | cattle/D                                   | TET, STR, CHL, KAN                        | 0.5                                               | >16               | 0.5                |
| U-B65                         | cattle/D                                   | TET, STR, AMP                             | 0.5                                               | >16               | 1                  |
| U-B67                         | cattle/D                                   | TET, STR, AMP                             | 1                                                 | >16               | 1                  |
| 2512                          | cattle/H                                   | TET, STR, AMP, CHL, GEN, KAN, SUL,<br>TMP | 1                                                 | >16               | 8                  |
| 3242                          | cattle/H                                   | TET, STR, SUL                             | 0.5                                               | >16               | 1                  |
| 3259                          | cattle/H                                   | TET, STR, AMP, CHL                        | 0.5                                               | >16               | 1                  |
| 5577                          | cattle/nk                                  | unknown status                            | 0.5                                               | 16                | 1                  |
| 5578                          | cattle/nk                                  | unknown status                            | 0.25                                              | >16               | 1                  |
| 5838                          | cattle/nk                                  | unknown status                            | 0.25                                              | >16               | 1                  |
| 5848                          | cattle/nk                                  | unknown status                            | 0.5                                               | >16               | 2                  |
| 5940                          | cattle/nk                                  | unknown status                            | 0.25                                              | >16               | 1                  |
| 5941                          | cattle/nk                                  | unknown status                            | 0.5                                               | >16               | 0.5                |
| 5952                          | cattle/nk                                  | unknown status                            | 0.5                                               | >16               | 1                  |
| 5953                          | cattle/nk                                  | unknown status                            | 0.5                                               | >16               | 1                  |
| 6040                          | cattle/nk                                  | unknown status                            | 0.5                                               | >16               | 2                  |
| 6086                          | cattle/nk                                  | unknown status                            | 0.5                                               | 16                | 2                  |
| 6091                          | cattle/nk                                  | unknown status                            | 0.5                                               | >16               | 1                  |
| 6105                          | cattle/nk                                  | unknown status                            | 0.25                                              | >16               | 0.5                |
| 6320                          | cattle/nk                                  | unknown status                            | 0.5                                               | >16               | 1                  |
| 6355                          | cattle/nk                                  | unknown status                            | 1                                                 | >16               | 4                  |
| 6356                          | cattle/nk                                  | unknown status                            | 0.25                                              | 8                 | 1                  |
| 6401                          | cattle/nk                                  | unknown status                            | 0.5                                               | >16               | 0.5                |
| 6467                          | cattle/nk                                  | unknown status                            | 0.5                                               | >16               | 1                  |
| 6475                          | cattle/nk                                  | unknown status                            | 0.5                                               | >16               | 4                  |
| 6884                          | cattle/nk                                  | unknown status                            | 0.5                                               | >16               | 4                  |
| 6888                          | cattle/nk                                  | unknown status                            | 1                                                 | >16               | 2                  |

| Isolate                      | Origin/<br>clinical<br>status <sup>1</sup> | Resistance profile <sup>2</sup>   | Minimal inhibitory concentration (MIC)<br>[µg/mL] |                   |                    |
|------------------------------|--------------------------------------------|-----------------------------------|---------------------------------------------------|-------------------|--------------------|
|                              |                                            |                                   | Celastra-<br>mycin A                              | Maduranic<br>acid | Closthio-<br>amide |
| 454                          | cattle/nk                                  | unknown status                    | 0.5                                               | >16               | 2                  |
| 637                          | cattle/nk                                  | unknown status                    | 0.5                                               | >16               | 4                  |
| 686                          | cattle/nk                                  | unknown status                    | 0.5                                               | >16               | 2                  |
| 688                          | cattle/nk                                  | unknown status                    | 0.5                                               | >16               | 0.5                |
| 708                          | cattle/nk                                  | unknown status                    | 0.5                                               | >16               | 1                  |
| 731                          | cattle/nk                                  | unknown status                    | 0.5                                               | >16               | 8                  |
| 781                          | cattle/nk                                  | unknown status                    | 0.5                                               | >16               | 2                  |
| 786                          | cattle/nk                                  | unknown status                    | 0.5                                               | >16               | 1                  |
| <i>Pasteurella multocida</i> |                                            |                                   |                                                   |                   |                    |
| B444                         | pig/nk                                     | TET, STR                          | 0.125                                             | 1                 | 0.25               |
| B61                          | pig/nk                                     | TET, STR                          | 0.25                                              | 2                 | 0.25               |
| B71a                         | pig/nk                                     | TET, STR, KAN, GEN                | 0.25                                              | 2                 | 0.25               |
| B87/99                       | pig/nk                                     | TET, STR, GEN, SXT, TMP           | 1                                                 | 2                 | 0.5                |
| H151                         | cattle/nk                                  | TET, STR, KAN, AMP, GEN, SXT, TMP | 0.5                                               | 4                 | 0.25               |
| H3152                        | pig/D                                      | TET, STR, KAN                     | 0.125                                             | 1                 | 0.5                |
| H468                         | pig/nk                                     | TET, STR, SXT, TMP                | 0.5                                               | 2                 | 0.125              |
| U-B214                       | cattle/D                                   | TET, STR, AMP                     | 0.5                                               | 1                 | 0.5                |
| U-B447                       | cattle/D                                   | TET, STR, KAN, AMP, SXT, TMP      | 0.5                                               | 1                 | 1                  |
| U-P207                       | pig/D                                      | TET, STR                          | 0.5                                               | 2                 | 0.25               |
| 623                          | pig/nk                                     | unknown status                    | 0.125                                             | 2                 | 0.5                |
| 640                          | pig/nk                                     | unknown status                    | 0.5                                               | 4                 | 0.25               |
| 687                          | pig/nk                                     | unknown status                    | 0.5                                               | 2                 | 0.25               |
| 694                          | pig/nk                                     | unknown status                    | 0.25                                              | 1                 | 0.25               |
| 721                          | pig/nk                                     | unknown status                    | 0.25                                              | 1                 | 0.5                |
| 1142                         | pig/nk                                     | unknown status                    | 0.25                                              | 1                 | 0.25               |
| 1148                         | pig/nk                                     | unknown status                    | 1                                                 | 1                 | 0.25               |
| 1179                         | pig/nk                                     | unknown status                    | 0.25                                              | 1                 | 0.063              |
| 1271                         | pig/nk                                     | unknown status                    | 0.125                                             | 1                 | 0.25               |
| 1403                         | pig/nk                                     | unknown status                    | 0.25                                              | 0.5               | 0.25               |
| 1450                         | pig/nk                                     | unknown status                    | 0.5                                               | 1                 | 0.25               |
| 1057                         | cattle/nk                                  | unknown status                    | 0.125                                             | 0.25              | 0.063              |
| 1175                         | cattle/nk                                  | unknown status                    | 0.5                                               | 2                 | 0.5                |
| 1198                         | cattle/nk                                  | unknown status                    | ≤0.008                                            | ≤0.008            | 0.03               |
| 1275                         | cattle/nk                                  | unknown status                    | 0.5                                               | 1                 | 0.25               |
| 1589                         | cattle/nk                                  | unknown status                    | ≤0.008                                            | ≤0.008            | 0.031              |
| 5465                         | cattle/nk                                  | unknown status                    | 0.125                                             | 0.125             | 0.031              |
| 5466                         | cattle/nk                                  | unknown status                    | ≤0.008                                            | 0.25              | 0.063              |
| 5492                         | cattle/nk                                  | unknown status                    | 0.125                                             | 0.25              | 0.031              |
| 5521                         | cattle/nk                                  | unknown status                    | 0.125                                             | 0.015             | 0.015              |
| 5575                         | cattle/nk                                  | unknown status                    | 0.063                                             | ≤0.008            | 0.063              |
| 5579                         | cattle/nk                                  | unknown status                    | 0.031                                             | ≤0.008            | 0.063              |
| 5580                         | cattle/nk                                  | unknown status                    | 0.031                                             | ≤0.008            | 0.063              |
| 5868                         | cattle/nk                                  | unknown status                    | 0.031                                             | 0.125             | 0.031              |
| 5925                         | cattle/nk                                  | unknown status                    | 0.25                                              | 0.125             | 0.063              |
| 5928                         | cattle/nk                                  | unknown status                    | 0.125                                             | 0.25              | 0.063              |
| 5933                         | cattle/nk                                  | unknown status                    | 0.063                                             | 0.125             | 0.125              |
| 5934                         | cattle/nk                                  | unknown status                    | 0.25                                              | 0.25              | 0.25               |
| 5935                         | cattle/nk                                  | unknown status                    | 1                                                 | 1                 | 1                  |
| 5939                         | cattle/nk                                  | unknown status                    | 0.125                                             | 0.25              | 0.063              |
| 6002                         | cattle/nk                                  | unknown status                    | 0.125                                             | 0.25              | 0.125              |

| Isolate | Origin/<br>clinical<br>status <sup>1</sup> | Resistance profile <sup>2</sup> | Minimal inhibitory concentration (MIC)<br>[µg/mL] |                   |                    |
|---------|--------------------------------------------|---------------------------------|---------------------------------------------------|-------------------|--------------------|
|         |                                            |                                 | Celastra-<br>mycin A                              | Maduranic<br>acid | Closthio-<br>amide |
| 6034    | cattle/nk                                  | unknown status                  | 0.063                                             | 0.125             | 0.063              |
| 6118    | cattle/nk                                  | unknown status                  | 0.125                                             | 0.125             | 0.063              |
| 6193    | cattle/nk                                  | unknown status                  | 1                                                 | 2                 | 0.5                |
| 6255    | cattle/nk                                  | unknown status                  | 0.125                                             | 0.25              | 0.063              |
| 6304    | cattle/nk                                  | unknown status                  | 0.125                                             | 0.125             | 0.063              |
| 6592    | cattle/nk                                  | unknown status                  | 0.125                                             | 0.25              | 0.031              |
| 2481    | cattle/nk                                  | TET, STR, KAN, GEN, SUL         | 0.5                                               | 4                 | 0.5                |
| 1007    | cattle/nk                                  | TET, STR, KAN, GEN, SPT, SUL    | 0.5                                               | 0.5               | 0.25               |
| 7       | cattle/nk                                  | unknown status                  | 0.125                                             | 0.25              | 0.25               |
| 63      | cattle/nk                                  | unknown status                  | 0.125                                             | 1                 | 0.5                |
| 128     | cattle/nk                                  | unknown status                  | 0.031                                             | 0.125             | 0.063              |
| 256     | cattle/nk                                  | unknown status                  | 0.5                                               | 1                 | 0.5                |
| 257     | cattle/nk                                  | unknown status                  | 0.5                                               | 1                 | 0.25               |
| 456     | cattle/nk                                  | unknown status                  | 0.5                                               | 1                 | 0.25               |
| 636     | cattle/nk                                  | unknown status                  | 0.125                                             | 0.5               | 0.063              |
| 681     | cattle/nk                                  | unknown status                  | 0.5                                               | 2                 | 0.5                |
| 683     | cattle/nk                                  | unknown status                  | ≤0.008                                            | ≤0.008            | 0.015              |
| 684     | cattle/nk                                  | unknown status                  | 0.125                                             | 0.125             | 0.063              |

**Annotations:** All isolates originated from Friedrich-Loeffler-Institut, Institute of Farm Animal Genetics, and some of the isolates were previously published (Kehrenberg 1998; Kehrenberg 2000; Kehrenberg 2001; Kehrenberg 2005).

1) **D**, suffering from respiratory diseases; **H**, healthy; **nk**, not known.

2) **AMP**, ampicillin; **CHL**, chloramphenicol; **GEN**, gentamicin; **KAN**, kanamycin; **SPT**, spectinomycin; **SXT**, sulfamethoxazol/trimethoprim; **STR**, streptomycin; **SUL**, sulphonamides; **TET**, tetracycline; **TMP**, trimethoprim.

## References

85. Kehrenberg, C.; Catry, B.; Haesebrouck, F.; de Kruif, A.; Schwarz, S. *tet(L)*-mediated tetracycline resistance in bovine *Mannheimia* and *Pasteurella* isolates. *J Antimicrob Chemother*, **2005**, 56, 403-6. <https://doi.org/10.1093/jac/dki210>.
86. Kehrenberg, C.; Salmon, S. A.; Watts, J. L.; Schwarz, S. Tetracycline resistance genes in isolates of *Pasteurella multocida*, *Mannheimia haemolytica*, *Mannheimia glucosida* and *Mannheimia varigena* from bovine and swine respiratory disease: intergeneric spread of the *tet(H)* plasmid pMHT1. *J Antimicrob Chemother*, **2001**, 48, 631-40. <https://doi.org/10.1093/jac/48.5.631>.
87. Kehrenberg, C.; Schwarz, S. Identification of a truncated, but functionally active *tet(H)* tetracycline resistance gene in *Pasteurella aerogenes* and *Pasteurella multocida*. *FEMS Microbiol Lett*, **2000**, 188, 191-5. <https://doi.org/10.1111/j.1574-6968.2000.tb09192.x>.
88. Kehrenberg, C.; Werckenthin, C.; Schwarz, S. Tn5706, a transposon-like element from *Pasteurella multocida* mediating tetracycline resistance. *Antimicrob Agents Chemother*, **1998**, 42, 2116-8. <https://doi.org/10.1128/AAC.42.8.2116>.
